# Supplementary material for: Novel graphene-like nanosheet supported highly active electrocatalysts with ultralow Pt loadings for oxygen reduction reaction
Source: Royal Society of Chemistry journal article supplement (doi:10.1039/c4ta03704a), 2014-01-01
Supplement: c4ta03704a1.pdf [file c4ta03704a1.pdf]

## Supporting Information (SI)

# Novel Graphene-Like Nanosheets Supported Highly Active Electrocatalysts with Ultralow Pt Loadings for Oxygen Reduction Reaction

Zesheng Li<sup>a,§</sup>, Yunyong Li<sup>a,§</sup>, San Ping Jiang<sup>b,\*</sup>, Guoqiang He<sup>c</sup> and Pei Kang Shen<sup>a,\*</sup>

<sup>a</sup> The State Key Laboratory of Optoelectronic Materials and Technologies, School of Physics and Engineering, Sun Yat-sen University, Guangzhou, 510275, PR China.

<sup>b</sup> Fuels and Energy Technology Institute & Department of Chemical Engineering, Curtin University, Perth, WA6102, Australia

<sup>c</sup> College of Materials Science and Engineering, Guangxi University, Nanning, Guangxi, 530004, PR China.

*§ Those authors contributed equally.*

### Additional results:

The average size of this Pd<sub>10</sub>Pt<sub>1</sub> NPs was measured to be 4.36 nm by the TEM measurement from 60 randomly selected nanoparticles (**Figure S1**). The result is well in accordance with that of XRD analysis.

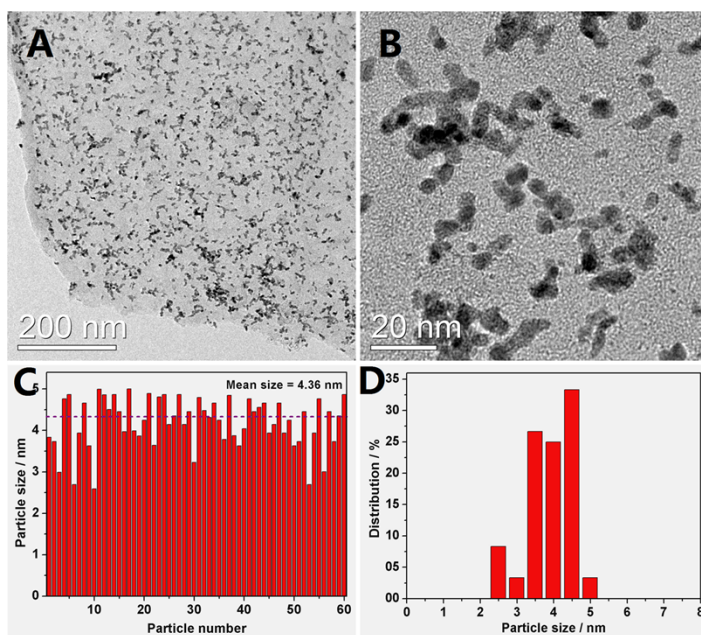

**Figure S1.** Particle size distribution of Pd<sub>10</sub>Pt<sub>1</sub> NPs by TEM measurement.

The analysis of energy-dispersive X-ray spectroscopy (EDS) based on a selected area TEM image is presented in **Figure S2**. The EDS measurement confirmed that this selected area contains elements of C, O, Pd, Pt and Cu with mass ratio of 12.3 : 1.87 : 44.01 : 4.70 : 37.39 and atomic ratio of 46.71 : 5.44 : 19.28 : 1.13 : 27.44. The mass ratio of Pd and Pt from EDS is 9.36, which is a little lower than that of ICP-AES analysis (29.19 wt.% Pd + 2.85 wt.% Pt, the mass ratio of Pd and Pt = 10.24).

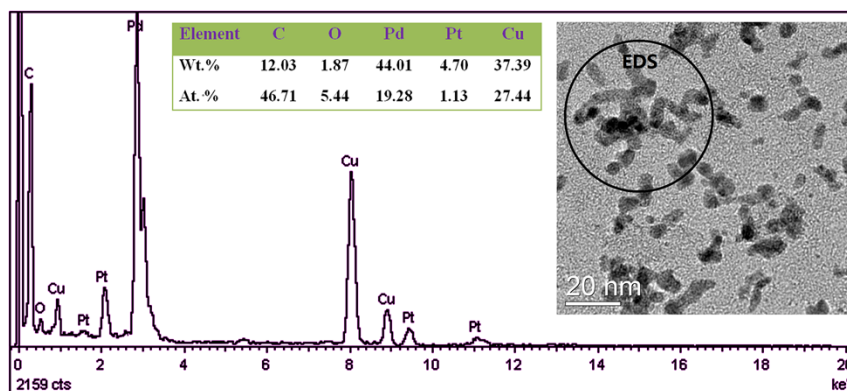

**Figure S2.** TEM selected-area EDS analysis of the Pd<sub>10</sub>Pt<sub>1</sub>/AGNs.

Pd<sub>10</sub>Pt<sub>1</sub>/RGO catalyst with the same metal loadings was also prepared by using reduced graphene oxide (RGO) as a support for comparison. **Figure S3A** is the XRD pattern of Pd<sub>10</sub>Pt<sub>1</sub>/RGO and **Figure S3B** is the TEM image of Pd<sub>10</sub>Pt<sub>1</sub>/RGO. It is shown in **Figure S3A** that the diffraction peak the RGO (2theta=20-30 degrees) is very broad due to their partially restored graphitic structures. **Figure S3B** shows the massive Pd<sub>10</sub>Pt<sub>1</sub> nanoparticles and slightly agglomerated on the RGO. **Figure S3C** shows the ORR performance of Pd<sub>10</sub>Pt<sub>1</sub>/AGNs compared with Pd<sub>10</sub>Pt<sub>1</sub>/RGO and the **Figure S3D** shows the Nyquist plots obtained from the electrochemical impedance spectroscopy (EIS) of Pd<sub>10</sub>Pt<sub>1</sub>/RGO and Pd<sub>10</sub>Pt<sub>1</sub>/AGNs.

The mass activity ( $i_m$ ) of the Pd<sub>10</sub>Pt<sub>1</sub>/RGO catalyst at 0.9 V was only 870 mA mg<sup>-1</sup><sub>Pt</sub>, which is much lower than that of Pd<sub>10</sub>Pt<sub>1</sub>/AGNs catalysts (1934 mA mg<sup>-1</sup><sub>Pt</sub>) (see **Figure S3C**). **Figure S3D** gives the evidence that the ohmic resistance of the Pd<sub>10</sub>Pt<sub>1</sub>/AGNs is much lower than that of Pd<sub>10</sub>Pt<sub>1</sub>/RGO measured by electrochemical impedance spectroscopy (EIS). The larger semicircles (larger charge

transfer resistance (CTR)) and the larger x-intercept (larger equivalent series resistance (ESR)) were observed on Pd<sub>10</sub>Pt<sub>1</sub>/RGO, whereas, only small semicircle and x-intercept were shown for Pd<sub>10</sub>Pt<sub>1</sub>/AGNs. Therefore, it is reasonable that the Pd<sub>10</sub>Pt<sub>1</sub>/AGNs catalyst shows much higher activity (over twofold) than the Pd<sub>10</sub>Pt<sub>1</sub>/RGO catalyst, owing to the outstanding supporting effect and the better electronic conductivity of the AGNs.

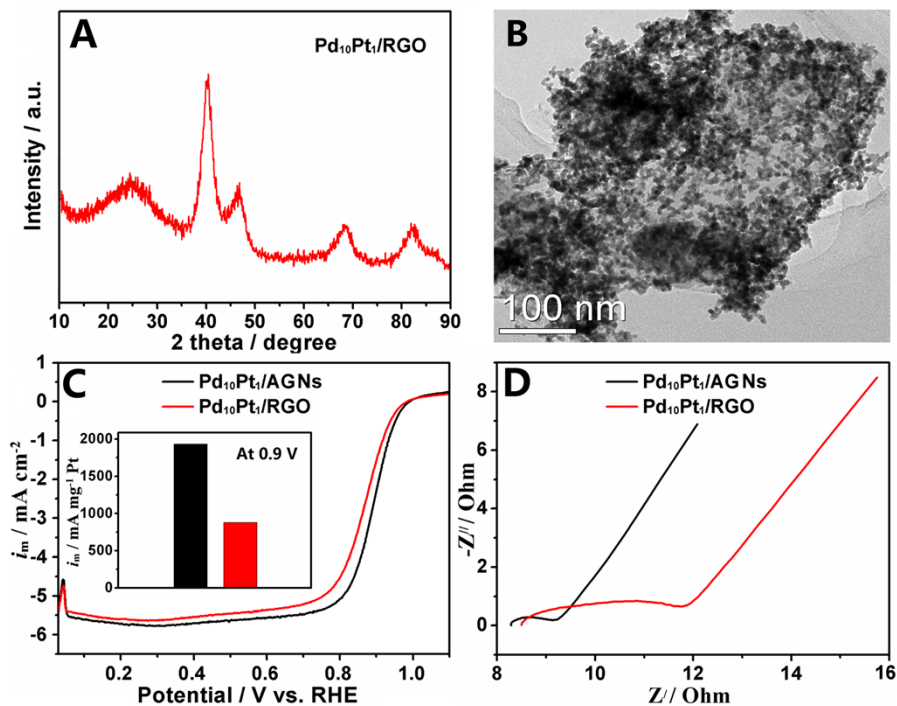

**Figure S3.** (A) XRD pattern of Pd<sub>10</sub>Pt<sub>1</sub>/RGO, (B) TEM image of Pd<sub>10</sub>Pt<sub>1</sub>/RGO, (C) ORR curves of Pd<sub>10</sub>Pt<sub>1</sub>/RGO and Pd<sub>10</sub>Pt<sub>1</sub>/AGNs, and (D) Nyquist plots obtained from the EIS of Pd<sub>10</sub>Pt<sub>1</sub>/RGO and Pd<sub>10</sub>Pt<sub>1</sub>/AGNs.

The stability of the commercial Pt/C catalyst much lower as shown in **Figure S4**. It lost about 30 % activity after 1,000 cycles which larger than that of the Pd<sub>10</sub>Pt<sub>1</sub>/AGNs after 10,000 cycles.

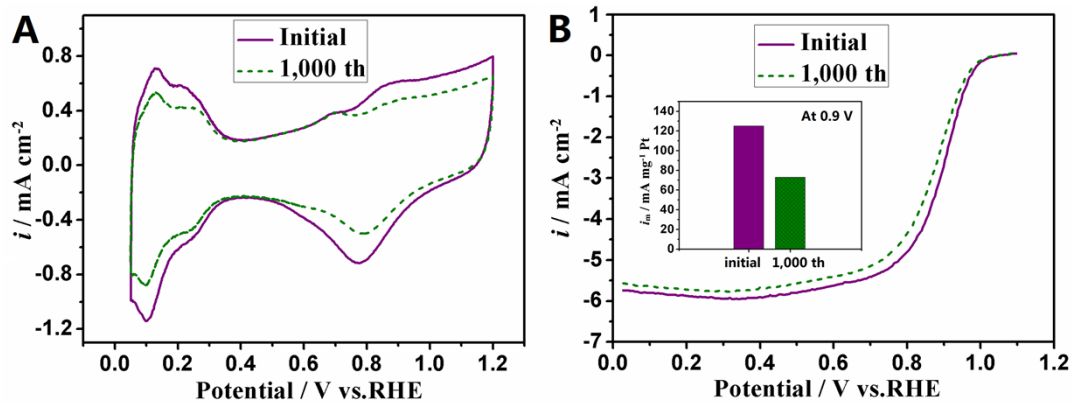

**Figure S4.** CV curves (A) and ORR curves (B) of commercial Pt/C catalyst (46.7 wt.%Pt, TKK, Japan).
